# Supplementary material for: Indium doping-assisted monolayer Ga2O3 exfoliation for performance-enhanced MOSFETs
Source: Royal Society of Chemistry journal article supplement (doi:10.1039/d3nr00899a), 2023-01-01
Supplement: d3nr00899a1.pdf [file d3nr00899a1.pdf]

## Electronic Supplementary Material

### Indium Doping-Assisted Monolayer Ga<sub>2</sub>O<sub>3</sub> Exfoliation for Performance-Enhanced

#### MOSFETs

Penghui Li<sup>1</sup>, Linpeng Dong<sup>1,2,\*</sup>, Chong Li<sup>3</sup>, Bin Lu<sup>4</sup>, Chen Yang<sup>1</sup>, Bo Peng<sup>5</sup>, Wei Wang<sup>1</sup>, Yuanhao Miao<sup>2,6,\*</sup>, and Weiguo Liu<sup>1</sup>

<sup>1</sup>Shaanxi Province Key Laboratory of Thin Films Technology and Optical Test, Xi'an Technological University, Xi'an, 710032, China.

<sup>2</sup>Research and Development Center of Optoelectronic Hybrid IC, Guangdong Greater Bay Area Institute of Integrated Circuit and System, Guangdong, 510535, China.

<sup>3</sup>Xi'an Xiangteng Microelectronics Technology Co., Ltd., Xi'an, 710075, China.

<sup>4</sup>School of Physics and Information Engineering, Shanxi Normal University, Linfen, 041004, China.

<sup>5</sup>Key Laboratory of Wide Band-Gap Semiconductor Materials and Devices, School of Microelectronics, Xidian University, Xi'an, 710071, China.

<sup>6</sup>Key Laboratory of Microelectronic Devices & Integrated Technology, Institute of Microelectronics, Chinese Academy of Sciences, Beijing, 100029, China.

\*Email: [lpdong@xatu.edu.cn](mailto:lpdong@xatu.edu.cn), [miaoyuanhao@giics.com.cn](mailto:miaoyuanhao@giics.com.cn)

**Table S1**  $\Delta E$  (eV/nm<sup>2</sup>) of ML Ga<sub>2</sub>O<sub>3</sub> with different In doping concentrations and atomic configurations, and is defined as the relative energy difference between the In-doped ML Ga<sub>2</sub>O<sub>3</sub> and the pristine ML Ga<sub>2</sub>O<sub>3</sub>. The corresponding structure is presented in Fig. S2.

|                                                           | $\Delta E$<br>(eV/nm <sup>2</sup> ) |
|-----------------------------------------------------------|-------------------------------------|
| ML GaInO <sub>3</sub> BA'                                 | 16.58                               |
| ML GaInO <sub>3</sub> AB                                  | 17.19                               |
| ML GaInO <sub>3</sub> AA'                                 | 10.29                               |
| ML Ga <sub>1.5</sub> In <sub>0.5</sub> O <sub>3</sub> AB  | 8.95                                |
| ML Ga <sub>1.5</sub> In <sub>0.5</sub> O <sub>3</sub> A   | 6.52                                |
| ML Ga <sub>1.5</sub> In <sub>0.5</sub> O <sub>3</sub> AA' | 6.19                                |
| ML 13% In-Ga <sub>2</sub> O <sub>3</sub>                  | 3.17                                |
| ML 6% In-Ga <sub>2</sub> O <sub>3</sub>                   | 1.65                                |
| ML 3% In-Ga <sub>2</sub> O <sub>3</sub>                   | 0.69                                |

**Table S2** Phonon mode-resolved electron mobility of ML Ga<sub>2</sub>O<sub>3</sub>, Ga<sub>1.5</sub>In<sub>0.5</sub>O<sub>3</sub> and GaInO<sub>3</sub>.

| Phonon<br>Mode | ML Ga <sub>2</sub> O <sub>3</sub> |             | ML Ga <sub>1.5</sub> In <sub>0.5</sub> O <sub>3</sub> |             | ML GaInO <sub>3</sub> |             |
|----------------|-----------------------------------|-------------|-------------------------------------------------------|-------------|-----------------------|-------------|
|                | x direction                       | y direction | x direction                                           | y direction | x direction           | y direction |
| ZA             | 2.85E+03                          | 4.83E+03    | 2.21E+01                                              | 5.26E+01    | 1.86E+03              | 3.16E+03    |
| TA             | 2.00E+05                          | 1.78E+05    | 1.33E+04                                              | 2.31E+04    | 1.54E+05              | 1.54E+05    |
| LA             | 1.57E+05                          | 2.32E+05    | 4.10E+03                                              | 5.25E+03    | 1.01E+05              | 1.61E+05    |
| OP1            | 2.15E+05                          | 2.51E+05    | 2.93E+05                                              | 1.20E+05    | 7.81E+04              | 5.66E+04    |
| OP2            | 1.26E+09                          | 9.33E+08    | 2.63E+06                                              | 7.62E+06    | 1.13E+08              | 8.07E+07    |
| OP3            | 1.29E+09                          | 1.77E+09    | 1.93E+04                                              | 1.92E+04    | 8.38E+03              | 9.03E+03    |
| OP4            | 1.25E+06                          | 1.01E+06    | 2.22E+05                                              | 4.36E+05    | 2.97E+04              | 2.14E+04    |
| OP5            | 7.93E+05                          | 1.40E+06    | 2.77E+04                                              | 1.88E+04    | 5.09E+08              | 4.05E+08    |
| OP6            | 2.17E+05                          | 1.10E+05    | 7.08E+05                                              | 1.95E+06    | 1.83E+05              | 3.10E+05    |
| OP7            | 1.31E+09                          | 2.50E+08    | 3.14E+05                                              | 1.78E+05    | 9.38E+06              | 6.02E+06    |
| OP8            | 1.49E+05                          | 1.11E+05    | 2.04E+05                                              | 2.12E+05    | 2.23E+04              | 2.54E+04    |
| OP9            | 5.36E+05                          | 3.26E+05    | 3.98E+04                                              | 2.90E+04    | 5.25E+05              | 4.20E+05    |
| OP10           | 3.69E+07                          | 2.65E+07    | 2.36E+05                                              | 3.17E+05    | 2.38E+04              | 1.96E+04    |
| OP11           | 3.52E+09                          | 4.67E+09    | 2.12E+08                                              | 2.39E+08    | 7.10E+06              | 8.65E+06    |
| OP12           | 2.15E+10                          | 3.16E+10    | 1.94E+07                                              | 1.50E+07    | 1.60E+06              | 2.10E+07    |
| OP13           | 5.27E+08                          | 3.90E+08    | 3.69E+07                                              | 3.71E+07    | 6.42E+05              | 5.36E+06    |
| OP14           | 4.47E+06                          | 4.78E+06    | 5.70E+05                                              | 4.75E+05    | 3.21E+05              | 3.15E+05    |
| OP15           | 2.44E+07                          | 1.38E+07    | 1.59E+06                                              | 1.29E+06    | 4.84E+05              | 3.46E+05    |
| OP16           | 2.79E+07                          | 2.38E+07    | 1.32E+05                                              | 1.74E+05    | 5.42E+05              | 4.64E+05    |
| OP17           | 5.06E+05                          | 7.99E+05    | 5.53E+04                                              | 7.27E+04    | 8.49E+03              | 1.07E+04    |
| OP18           | 7.17E+06                          | 5.60E+06    | 4.16E+04                                              | 8.18E+04    | 2.48E+05              | 1.89E+05    |
| OP19           | 4.73E+05                          | 1.25E+06    | 5.05E+04                                              | 1.29E+05    | 2.98E+04              | 1.32E+06    |
| OP20           | 1.03E+07                          | 1.51E+07    | 1.84E+05                                              | 2.25E+05    | 2.15E+06              | 3.25E+06    |

|      |          |          |          |          |          |          |
|------|----------|----------|----------|----------|----------|----------|
| OP21 | 8.79E+06 | 1.26E+07 | 3.85E+06 | 5.40E+06 | 3.78E+07 | 4.56E+07 |
| OP22 | 2.37E+08 | 1.50E+08 | 4.81E+05 | 6.79E+05 | 3.41E+06 | 1.20E+06 |
| OP23 | 9.69E+06 | 1.26E+07 | 2.32E+05 | 2.49E+05 | 2.01E+05 | 2.93E+05 |
| OP24 | 1.75E+07 | 3.45E+07 | 2.48E+05 | 5.75E+05 | 6.02E+04 | 9.49E+04 |
| OP25 | 6.76E+10 | 1.23E+11 | 2.68E+07 | 3.72E+07 | 1.10E+07 | 1.22E+07 |
| OP26 | 8.42E+07 | 1.46E+08 | 4.75E+06 | 7.17E+06 | 6.48E+06 | 8.16E+06 |
| OP27 | 9.97E+08 | 1.64E+09 | 8.93E+06 | 1.41E+07 | 1.05E+07 | 2.27E+07 |

**Table S3** Phonon mode-resolved hole mobility of ML Ga<sub>2</sub>O<sub>3</sub> and GaInO<sub>3</sub>.

| Phonon<br>Mode | ML Ga <sub>2</sub> O <sub>3</sub> |             | ML GaInO <sub>3</sub> |             |
|----------------|-----------------------------------|-------------|-----------------------|-------------|
|                | x direction                       | y direction | x direction           | y direction |
| ZA             | 8.60E+04                          | 4.83E+03    | 1.45E+04              | 1.56E+06    |
| TA             | 1.25E+05                          | 1.78E+05    | 4.51E+04              | 4.29E+06    |
| LA             | 5.83E+03                          | 2.32E+05    | 1.91E+03              | 1.39E+05    |
| OP1            | 7.71E+03                          | 2.51E+05    | 6.21E+02              | 4.91E+04    |
| OP2            | 8.72E+07                          | 9.33E+08    | 2.68E+03              | 1.84E+05    |
| OP3            | 1.08E+04                          | 1.77E+09    | 3.75E+02              | 2.97E+04    |
| OP4            | 1.46E+04                          | 1.01E+06    | 5.78E+03              | 4.89E+05    |
| OP5            | 1.43E+04                          | 1.40E+06    | 1.60E+07              | 1.30E+09    |
| OP6            | 7.55E+03                          | 1.10E+05    | 3.69E+03              | 2.79E+05    |
| OP7            | 2.08E+06                          | 2.50E+08    | 5.21E+04              | 4.38E+06    |
| OP8            | 1.67E+03                          | 1.11E+05    | 5.38E+02              | 4.45E+04    |
| OP9            | 4.20E+04                          | 8.57E+06    | 9.69E+04              | 8.34E+06    |
| OP10           | 2.39E+06                          | 9.16E+06    | 2.70E+03              | 3.01E+05    |
| OP11           | 5.93E+06                          | 4.40E+05    | 1.86E+05              | 1.27E+07    |
| OP12           | 1.72E+07                          | 6.43E+05    | 3.67E+04              | 2.56E+06    |
| OP13           | 1.28E+07                          | 6.93E+09    | 1.32E+05              | 1.15E+07    |
| OP14           | 1.36E+05                          | 8.07E+05    | 1.04E+05              | 7.11E+06    |
| OP15           | 5.44E+06                          | 1.00E+06    | 2.81E+04              | 1.98E+06    |
| OP16           | 4.06E+05                          | 1.18E+06    | 7.94E+03              | 4.33E+05    |
| OP17           | 2.63E+03                          | 5.91E+05    | 7.93E+02              | 4.81E+04    |
| OP18           | 1.55E+05                          | 1.75E+08    | 2.44E+05              | 1.41E+07    |
| OP19           | 8.61E+03                          | 1.25E+05    | 5.24E+03              | 2.61E+05    |
| OP20           | 1.70E+05                          | 3.42E+06    | 2.41E+04              | 1.50E+06    |
| OP21           | 1.33E+05                          | 2.01E+08    | 6.03E+06              | 4.62E+08    |
| OP22           | 1.87E+07                          | 5.77E+08    | 1.64E+06              | 7.77E+07    |
| OP23           | 2.26E+06                          | 1.31E+09    | 7.76E+04              | 4.42E+06    |
| OP24           | 4.29E+04                          | 1.28E+09    | 1.54E+04              | 8.20E+05    |
| OP25           | 3.02E+09                          | 1.14E+07    | 6.72E+06              | 6.81E+08    |
| OP26           | 7.05E+05                          | 5.62E+08    | 3.37E+05              | 7.02E+06    |
| OP27           | 1.99E+07                          | 3.77E+07    | 2.30E+07              | 3.83E+08    |

**Table S4** Benchmark of the device performances of the n-type sub-5 nm In-doping ML Ga<sub>2</sub>O<sub>3</sub> MOSFETs against the ITRS requirements for the LP application.

|    | direction   | In-doping concentration | $I_{on}$ ( $\mu\text{A}/\mu\text{m}$ ) | SS (mV/dec) | $I_{on}/I_{off}$  | $C_g$ (fF/ $\mu\text{m}$ ) | $\tau$ (ps) | PDP (fJ/ $\mu\text{m}$ ) |
|----|-------------|-------------------------|----------------------------------------|-------------|-------------------|----------------------------|-------------|--------------------------|
| LP | x-direction | pristine                | 390                                    | 72          | $7.8 \times 10^6$ | 0.193                      | 0.317       | 0.034                    |
|    |             | 3.3 %                   | 475                                    | 71          | $9.5 \times 10^6$ | 0.195                      | 0.262       | 0.035                    |
|    |             | 6.7 %                   | 575                                    | 69          | $1.2 \times 10^7$ | 0.194                      | 0.216       | 0.035                    |
|    |             | 10 %                    | 638                                    | 69          | $1.3 \times 10^6$ | 0.190                      | 0.191       | 0.036                    |
|    |             | 20 %                    | 744                                    | 66          | $1.5 \times 10^6$ | 0.188                      | 0.162       | 0.039                    |
|    | y-direction | pristine                | 155                                    | 76          | $3.1 \times 10^6$ | 0.202                      | 0.836       | 0.029                    |
|    |             | 5 %                     | 350                                    | 70          | $7.0 \times 10^6$ | 0.203                      | 0.371       | 0.032                    |
|    |             | 10 %                    | 375                                    | 70          | $7.5 \times 10^6$ | 0.203                      | 0.347       | 0.033                    |
|    |             | 20 %                    | 527                                    | 68          | $1.1 \times 10^7$ | 0.207                      | 0.252       | 0.038                    |
|    |             | ITRS <sup>2028</sup>    | $L_g = 5.9 \text{ nm}$                 | 295         |                   | $5.9 \times 10^6$          | 0.690       | 1.493                    |

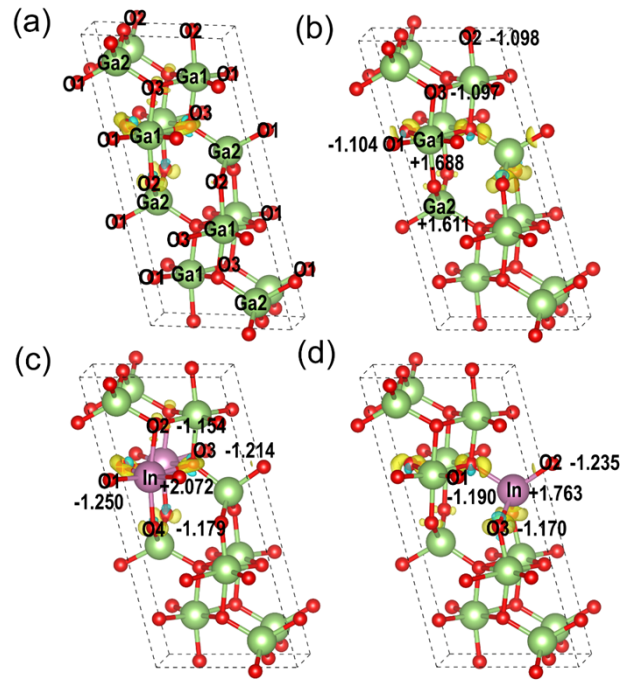

**Figure S1** Charge density difference (equivalence plane is  $0.02 \text{ e}/\text{\AA}^3$ ) and Bader charge analysis for pure and In-doped  $\beta\text{-Ga}_2\text{O}_3$  at the tetrahedral and octahedral Ga atom site.

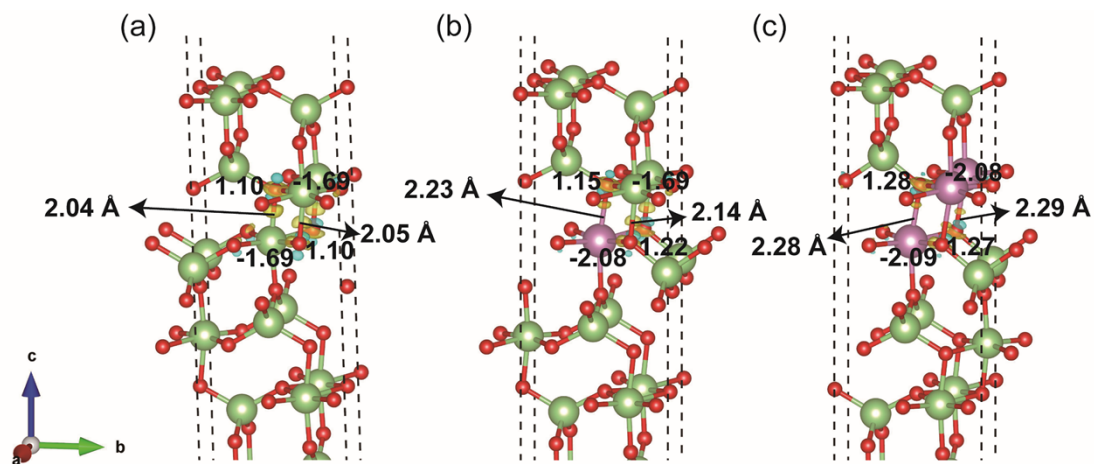

**Figure S2** Charge density difference isosurface distribution of pure (a) and In-doped  $\beta$ - $\text{Ga}_2\text{O}_3$  with different configurations (b), (c), the yellow and cyan regions denote the gain and loss of electrons, respectively, the isosurface value was set to  $0.01e/\text{\AA}^3$ . The In/Ga-O bond length as well as the Bader charge of the interface bonding atoms are labeled for comparison.

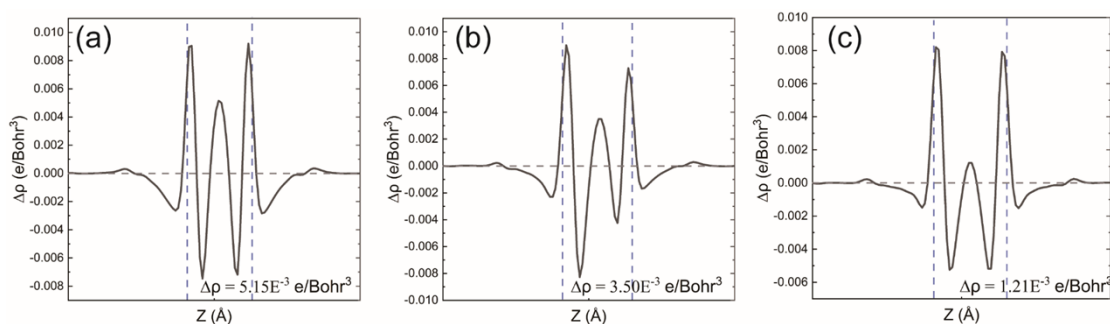

**Figure S3** Charge transfer of pure (a) and In-doped  $\beta$ - $\text{Ga}_2\text{O}_3$  with different configurations (b), (c) along c direction, the blue line represents the plane of outer Ga atom as labeled in Fig. S2.

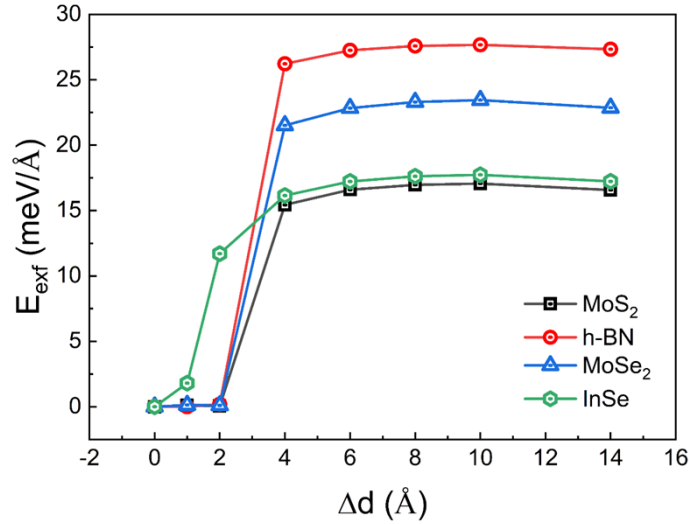

**Figure S4** Single-side exfoliation energy as a function of exfoliation distance of representative van der Waals 2D materials.

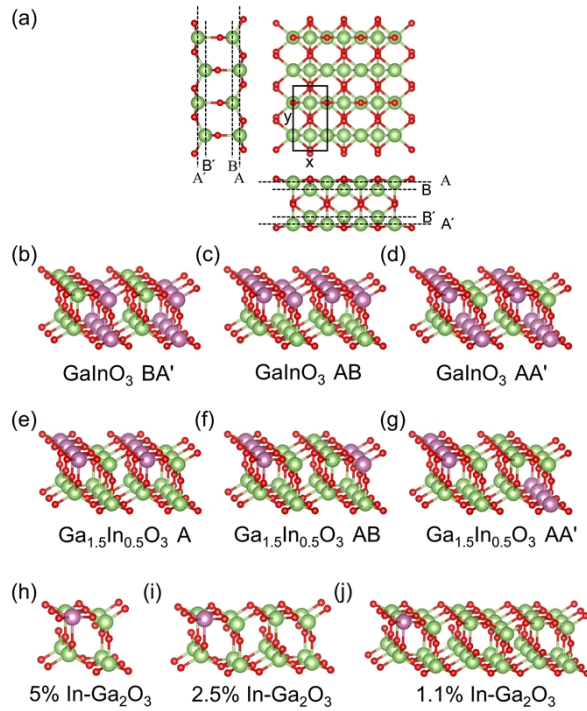

**Figure S5** (a) Top and side views of pristine ML  $\text{Ga}_2\text{O}_3$ , the crystal plane where the Ga atom located is labeled as ABB'A' pattern from top to bottom layers. (b), (c), and (d) are ML  $\text{GaInO}_3$  (20% In concentration) with different configurations, it is noted that (c) possesses a Janus structure. (e), (f), and (g) are ML  $\text{Ga}_{1.5}\text{In}_{0.5}\text{O}_3$  (10% In concentration) with different configurations. Low In concentration-doped ML  $\text{Ga}_2\text{O}_3$  with In concentration of (h) 5 %, (i) 2.5 %, and (j) 1.1 %.

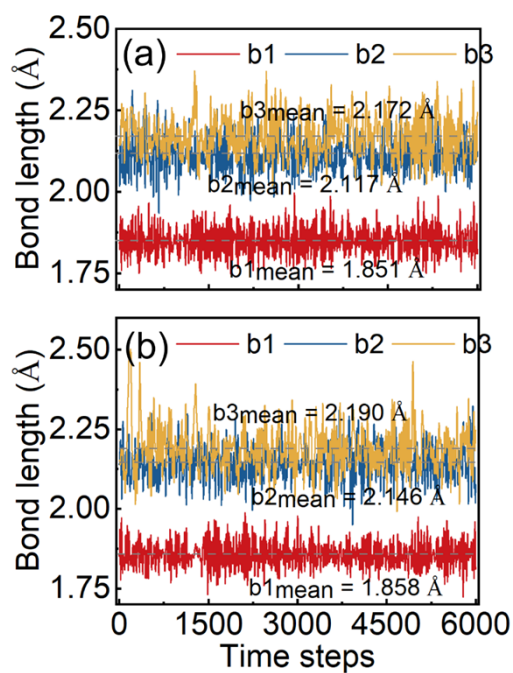

**Figure S6** Bond length as a function of time for ML (a)  $\text{Ga}_{1.5}\text{In}_{0.5}\text{O}_3$  and (b)  $\text{GaInO}_3$  at 300 K in a NVT ensemble with AIMD simulation.

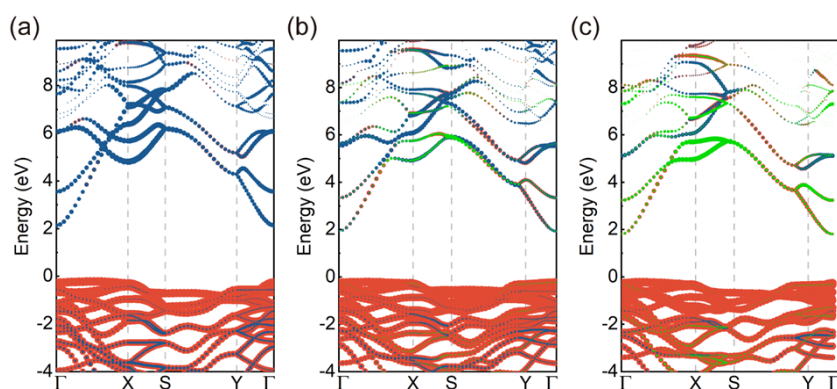

**Figure S7** Element-projected band structure of (a) ML  $\text{Ga}_2\text{O}_3$ , (b) ML  $\text{Ga}_{1.5}\text{In}_{0.5}\text{O}_3$  and (c) ML  $\text{GaInO}_3$ , the contribution from Ga, O, and In are presented by blue, red, and green colors, respectively.

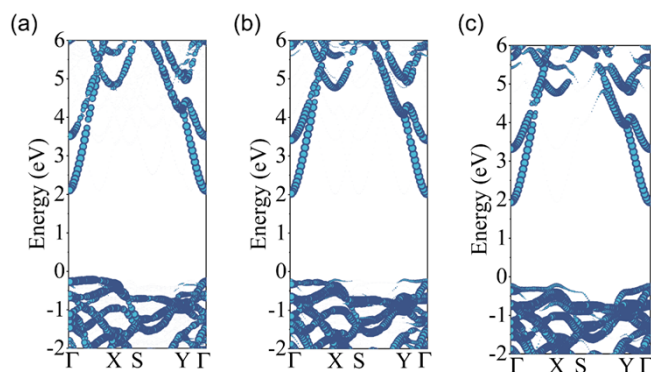

**Figure S8** Unfolded band structures of In-doped ML  $\text{Ga}_2\text{O}_3$  with In concentration of (a) 1.1 %, (b) 2.2 %, and (c) 4.4 %.

2.5 %, and (c) 5 %, respectively.

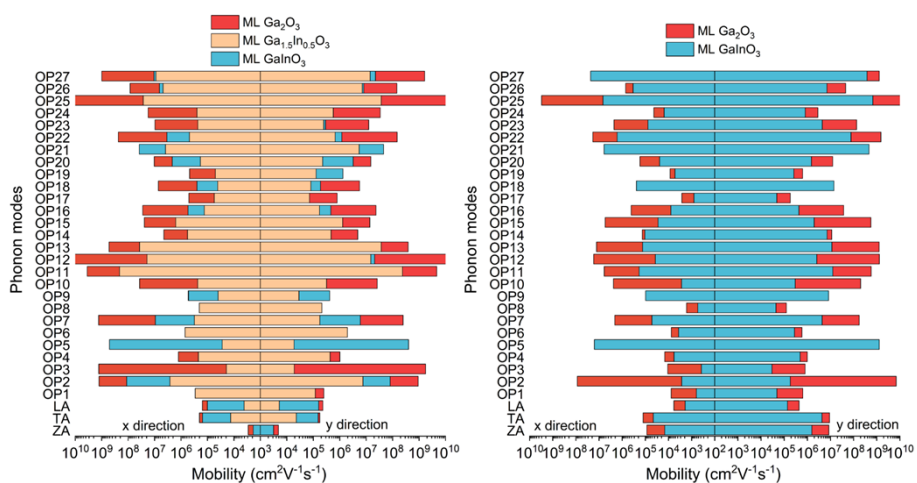

**Figure S9** Phonon mode-resolved electron (a) and hole mobility (b) of pristine and In-doped ML  $\text{Ga}_2\text{O}_3$ .

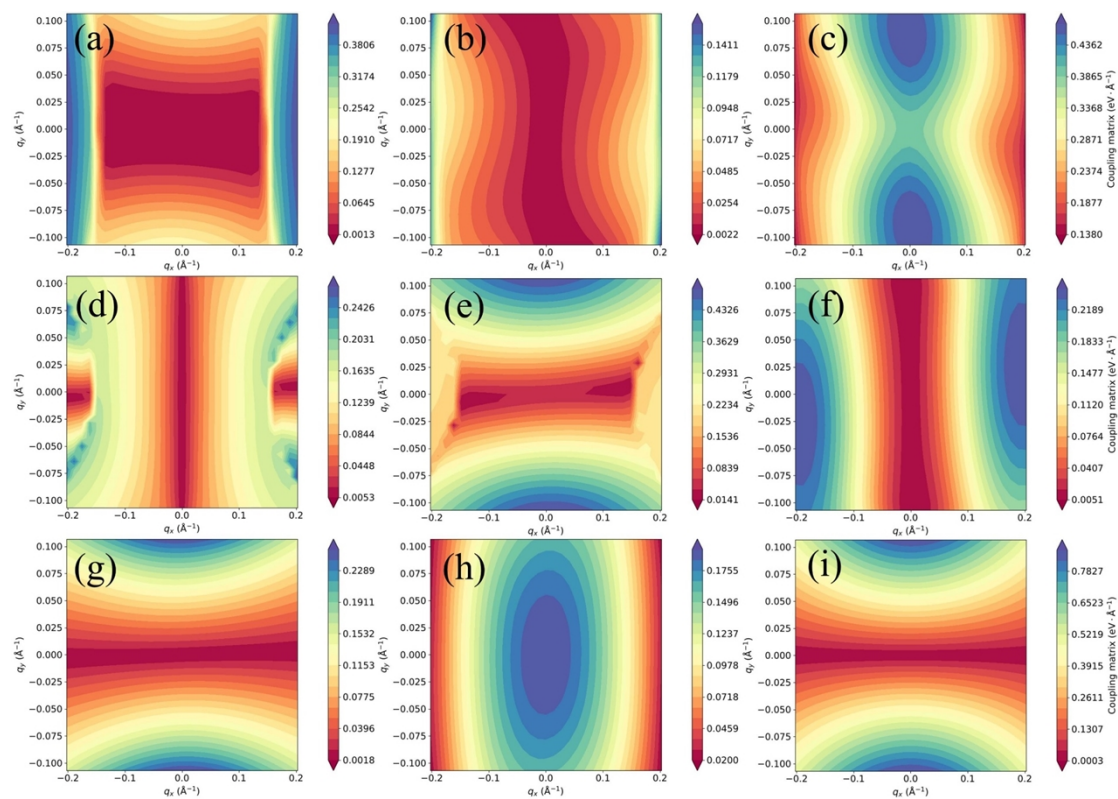

**Figure S10** The EPC matrix elements of the OP1~OP9 for ML  $\text{Ga}_{1.5}\text{In}_{0.5}\text{O}_3$  at the CBM.



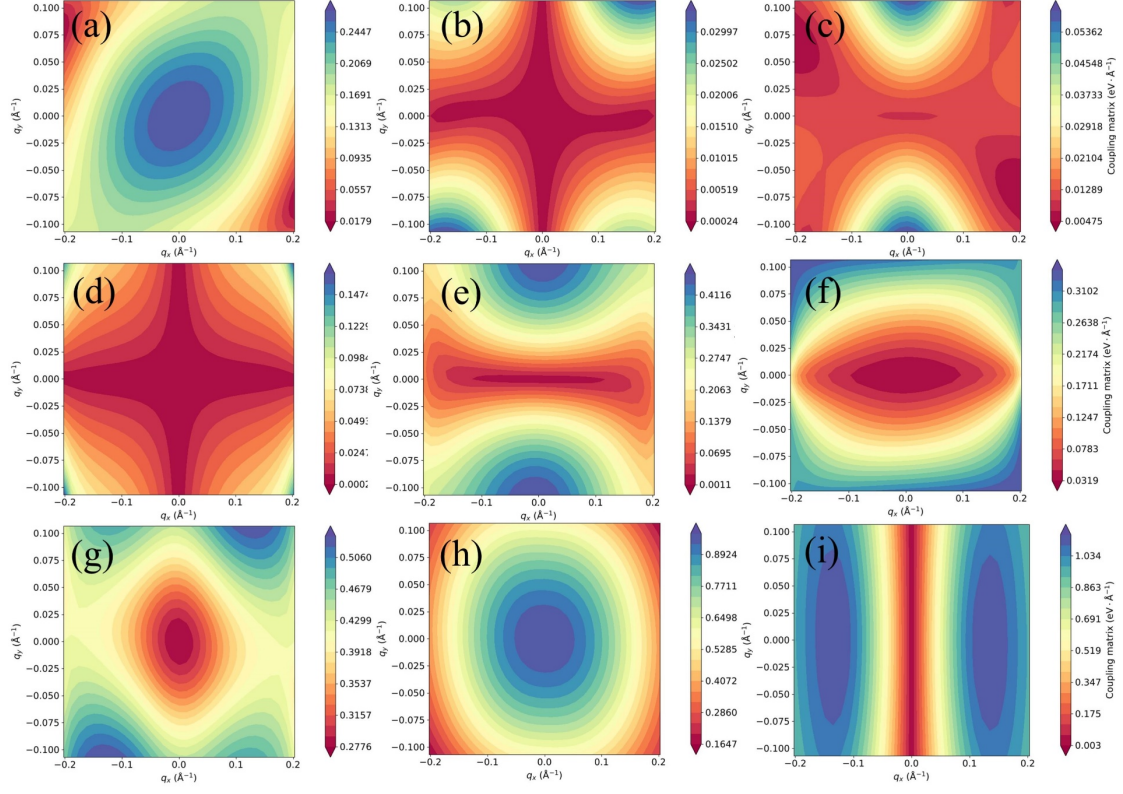

**Figure S11** The EPC matrix elements of the OP10~OP18 for ML  $\text{Ga}_{1.5}\text{In}_{0.5}\text{O}_3$  at the CBM.

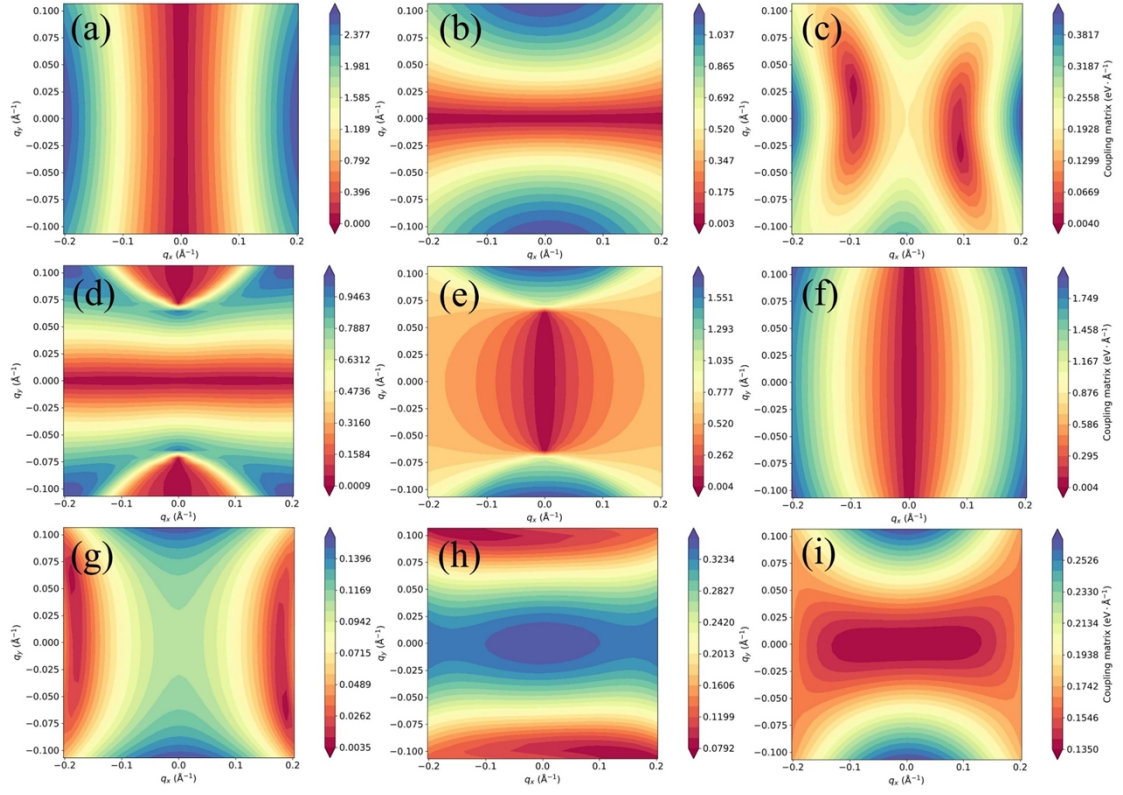

**Figure S12** The EPC matrix elements of the OP19~OP27 for ML  $\text{Ga}_{1.5}\text{In}_{0.5}\text{O}_3$  at the CBM.

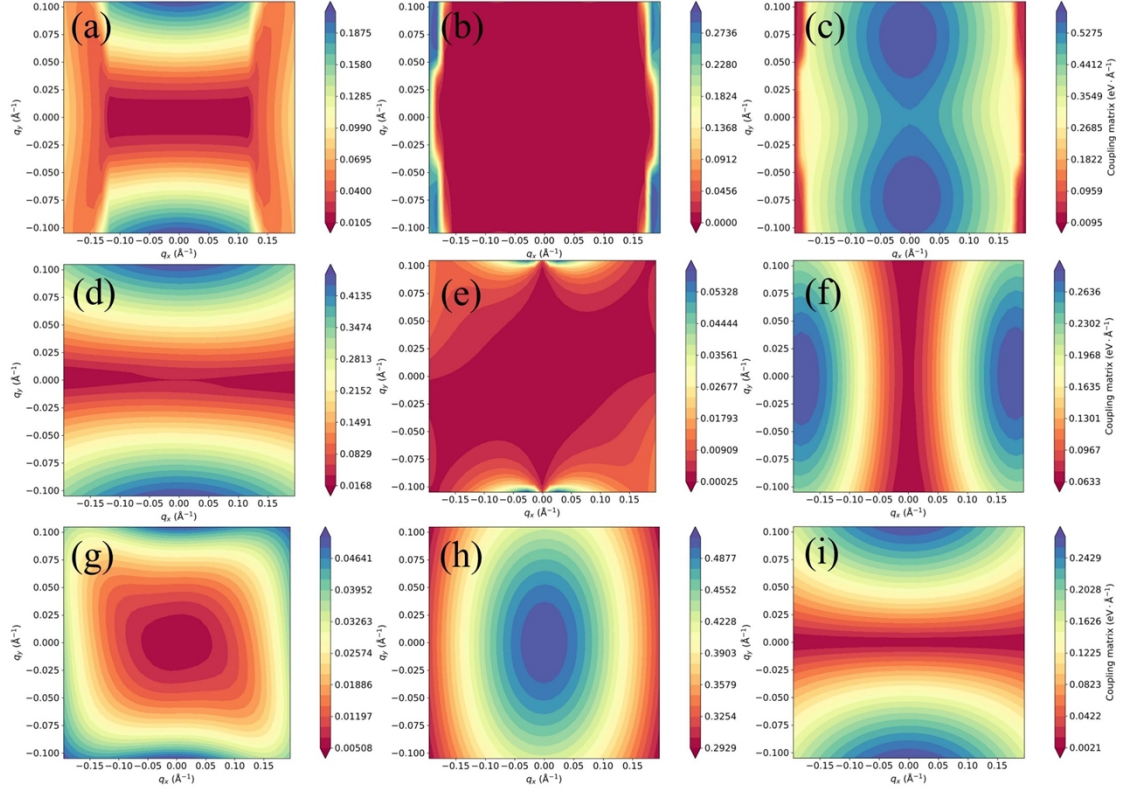

**Figure S13** The EPC matrix elements of the OP1~OP9 for ML GaInO<sub>3</sub> at the CBM.

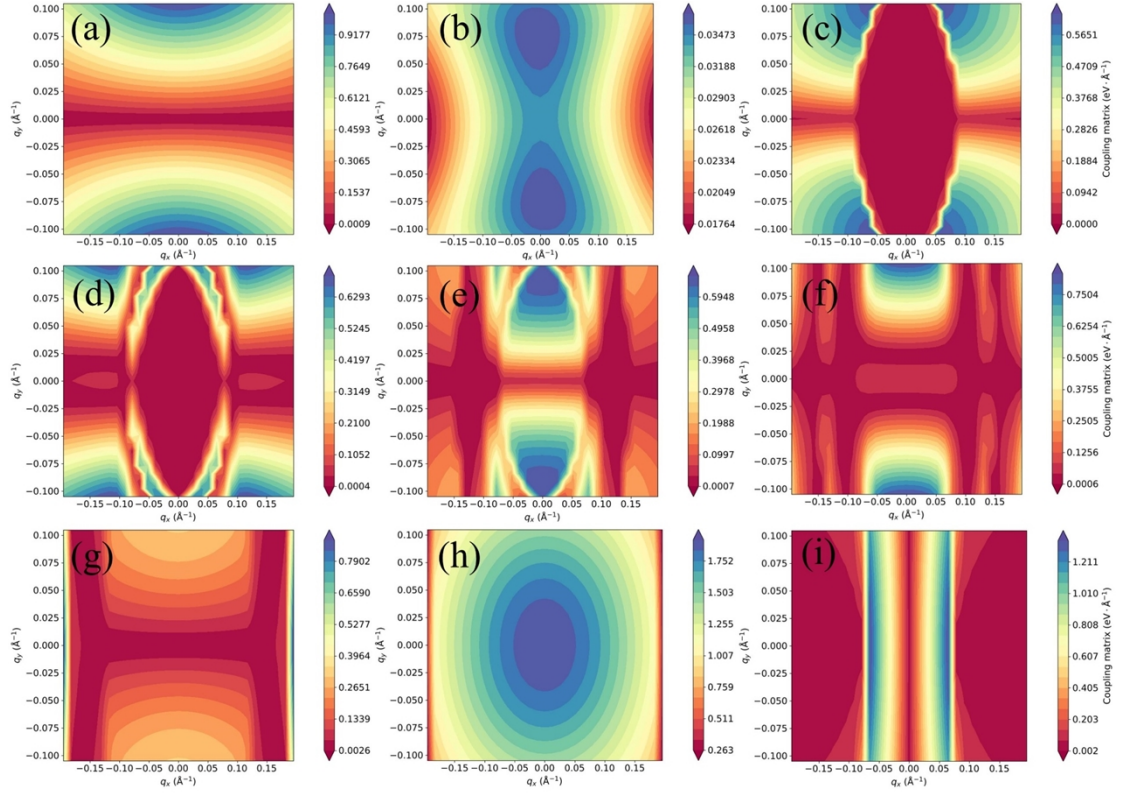

**Figure S14** The EPC matrix elements of the OP10~OP18 for ML GaInO<sub>3</sub> at the CBM.

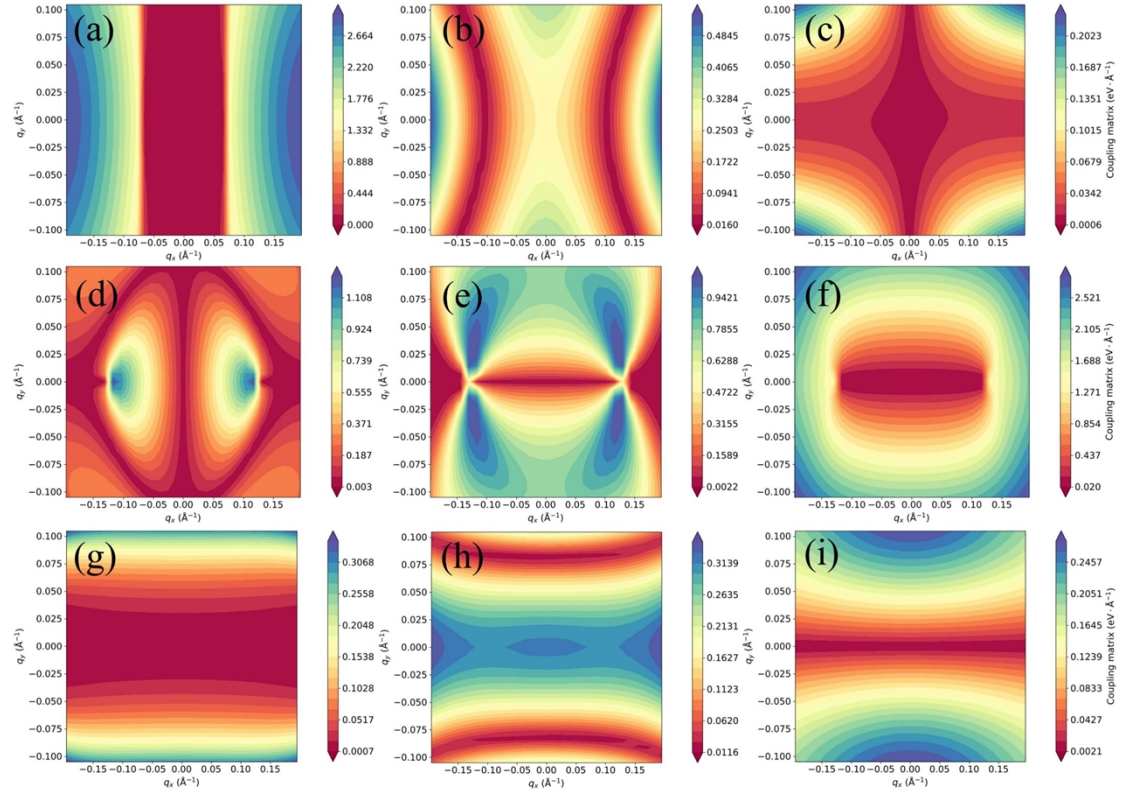

**Figure S15** The EPC matrix elements of the OP19~OP27 for ML GaInO<sub>3</sub> at the CBM.
